# Supplementary material for: Exploring the electron donor–acceptor duality of B3N3 in noncovalent interactions
Source: Royal Society of Chemistry journal article supplement (doi:10.1039/d3cp02656f), 2023-01-01
Supplement: d3cp02656f1.pdf [file d3cp02656f1.pdf]

# Supporting Information

## Section 1: Coordinates of optimized structures

### B3N3

N 1.49024900 -0.29555500 -0.00000300  
N -1.00107000 -1.14281200 0.00000000  
N -0.48917200 1.43836200 -0.00000500  
B 0.72069700 0.82273500 0.00000800  
B -1.07284700 0.21277000 0.00000300  
B 0.35214100 -1.03549800 -0.00000100

### NH3

N 0.00000000 0.00000000 0.11493400  
H 0.00000000 0.94201500 -0.26818000  
H -0.81580900 -0.47100700 -0.26818000  
H 0.81580900 -0.47100700 -0.26818000

### NCH

N 0.00000000 0.00000000 0.65274100  
C 0.00000000 0.00000000 -0.49923300  
H 0.00000000 0.00000000 -1.57378700

### N2H2

N 0.58826600 0.18946200 -0.00001300  
N -0.58827800 -0.18946900 -0.00001300  
H 1.17549400 -0.66372400 0.00009300  
H -1.17540900 0.66376800 0.00009300

### BNH3-1

N -2.19981500 -0.00219100 0.00239800  
N 0.07106900 1.31788800 -0.00247700  
N 0.07461900 -1.31623300 -0.00237400  
B -1.21506600 0.93144700 0.00088900  
B -1.21126300 -0.93345800 0.00074200  
B 0.62777000 0.00188900 -0.00324400  
N 2.23390200 0.00330400 0.00062700  
H 2.57476700 0.95596300 -0.12574500  
H 2.58271400 -0.60545800 -0.73963200  
H 2.57688600 -0.36927600 0.88622200

### BNH3-2

N -1.31396300 1.31845700 -0.00000400  
N 0.00049700 -0.92929600 0.00000100  
N 1.31514800 1.31869100 0.00000400  
B -1.13096900 -0.09479600 -0.00001000  
B 0.00154000 1.58759800 -0.00000200  
B 1.13088300 -0.09562100 0.00001900  
N 2.53969400 -0.89989400 0.00001100  
H 2.34449100 -1.89967800 -0.00034300  
H 3.08425200 -0.64173200 0.82156900  
H 3.08457800 -0.64116200 -0.82115300  
N -2.54377300 -0.89347900 -0.00001800  
H -2.59849400 -1.49326000 -0.82153500  
H -3.30682900 -0.21811300 0.00000500  
H -2.59848300 -1.49331300 0.82146100

### BNH3-3

N 1.44216400 -0.39758400 0.00215600  
N -0.37682200 1.44807900 -0.00264100  
N -1.06564000 -1.05007000 -0.00240300  
B 0.91459500 0.89960100 0.00019600  
B 0.32148400 -1.24189500 0.00038800  
B -1.23641700 0.34268200 -0.00261300  
N 0.72701100 -2.83704800 0.00029500  
H -0.13349500 -3.38132500 -0.00377900  
H 1.28593000 -3.04937000 0.82382500  
H 1.29236600 -3.04675700 -0.81953200  
N -2.82070400 0.78858900 0.00067400  
H -2.86584100 1.79663700 -0.13558200  
H -3.24552300 0.53481000 0.88999000  
H -3.31849900 0.29157200 -0.73480700  
N 2.09383500 2.04780800 0.00018700  
H 2.99495100 1.57371600 -0.01132900  
H 2.00403900 2.63234200 0.82843500  
H 1.98886400 2.64800400 -0.81495200

### BNCH-1

N 0.25880100 1.31392500 0.00000500  
N 0.25879100 -1.31392100 0.00002000  
N 2.53275600 -0.00000700 0.00002400  
B -0.27902400 0.00000400 -0.00017800  
B 1.54655600 0.93278900 0.00009100  
B 1.54654900 -0.93279500 0.00010100  
N -1.88287900 0.00000900 -0.00006100  
C -3.02387900 0.00000600 -0.00000100  
H 4.09940400 -0.00006500 0.00002300

### BNCH-2

N -1.31333400 1.54733400 0.00015000  
N -0.00000500 -0.70066700 -0.00019200  
N 1.31334100 1.54732300 -0.00006000  
B -1.11236000 0.14524200 -0.00001400  
B 0.00000400 1.82342700 0.00016400  
B 1.11235700 0.14523200 -0.00027200  
N 2.52326400 -0.66007800 -0.00038700  
C 3.52021900 -1.21698700 -0.00044600  
H 4.45768900 -1.74128300 0.00104700  
N -2.52327300 -0.66005700 0.00036800  
C -3.52023000 -1.21696500 0.00058600  
H -4.45757500 -1.74149100 -0.00042700

### BNCH-3

N -1.28267600 0.77394600 0.00013900  
N -0.02906200 -1.49793900 -0.00010600  
N 1.31159200 0.72366400 0.00023200  
B -1.10023800 -0.60717900 -0.00016100  
B 0.02428600 1.25617500 0.00044700  
B 1.07582300 -0.64935400 0.00000900  
N 2.49950900 -1.50831500 -0.00003300  
C 3.47831400 -2.09853800 -0.00007500  
H 4.39726900 -2.65249000 -0.00010700  
N 0.05659400 2.91880700 0.00000300  
C 0.07859500 4.06159400 -0.00038300  
H 0.09856400 5.13442100 0.00017600  
N -2.55598200 -1.41039200 -0.00007900  
C -3.55671000 -1.96264400 -0.00000800  
H -4.49620300 -2.48101700 0.00015800

### NHCN-1

N 0.03836200 -0.00245400 0.00303700  
N -2.23764700 1.31541900 -0.00082600  
N -2.24193900 -1.31287300 -0.00090700  
B -0.93527800 0.95069200 0.00087400  
B -0.93838200 -0.95240300 0.00079900  
B -2.57782200 0.00182400 -0.00172000  
C 3.31136000 -0.00050500 -0.00009500  
N 4.46409900 0.00049800 -0.00134200  
H 2.22912900 -0.00166400 0.00107500

### NHCN-2

N -1.31482500 0.36223400 0.00137100  
N 1.31470900 0.36202900 -0.00118200  
N 0.00011800 2.63700500 -0.00061000  
B -0.00008400 0.02366000 0.00020800  
B -0.94944900 1.67428600 0.00009400  
B 0.94953700 1.67413900 -0.00069600  
C -4.21990800 -1.21230400 0.00079700  
C 4.21996200 -1.21219100 -0.00026800  
N -5.24228500 -1.74407800 -0.00008200  
N 5.24223900 -1.74415600 0.00027200  
H 3.26190700 -0.71238300 -0.00057600  
H -3.26194600 -0.71231500 0.00098700

**NHCN-3**

N 0.54541600 1.41315500 0.00229500  
N -1.50097700 -0.23400500 -0.00139700  
N 0.94872400 -1.18262400 -0.00070400  
B -0.69206300 0.85580700 0.00063100  
B 1.08473000 0.16773500 0.00114400  
B -0.39952500 -1.02700600 -0.00158300  
C 1.75101400 4.52722400 0.00049800  
C 3.05069200 -3.77734100 -0.00016100  
C -4.80025700 -0.74876500 -0.00031700  
N 2.16977800 5.60073100 -0.00074100  
N 3.78050100 -4.66905600 -0.00000300  
N -5.93878100 -0.92634100 0.00039300  
H 2.36768400 -2.94148700 -0.00041100  
H -3.73374700 -0.58240700 -0.00077400  
H 1.35902600 3.52148600 0.00120400

**BNNH-1**

N 0.02602400 -1.17539200 -0.00090300  
N 0.52703100 1.41691600 -0.00127500  
N 2.50392100 -0.31420600 0.00126700  
B -0.25238400 0.22930300 -0.00132000  
B 1.36165400 -1.04581300 0.00033200  
B 1.71832800 0.79154200 0.00004800  
N -1.81383300 0.48252000 0.00124100  
N -2.65271300 -0.41291300 0.00015800  
H -2.18128600 1.44277700 0.00327900  
H -2.08971800 -1.29640900 -0.00199700

**BNNH-2**

N -1.43322600 1.28444500 -0.00030100  
N 0.26228800 -0.69200700 0.00085100  
N 1.14745700 1.76171700 0.00006000  
B -0.99222600 -0.07551900 0.00036800  
B -0.19570700 1.79670500 -0.00028100  
B 1.21868200 0.34694000 0.00065900  
N 2.69799900 -0.22958300 0.00012800  
N 2.94693000 -1.43228700 -0.00097400  
N -2.24309900 -1.05022400 0.00063800  
N -3.40990900 -0.66658400 -0.00080600  
H 3.51201000 0.39784400 0.00011800  
H 1.99500700 -1.87663300 -0.00077400  
H -2.10949800 -2.06889300 0.00099100  
H -3.33034900 0.37871000 -0.00124000

**BNNH-3**

N 1.05180200 1.06199200 0.00083500  
N 0.39380600 -1.44134600 0.00004700  
N -1.44503200 0.38000900 0.00047500  
B 1.24074700 -0.33462500 0.00030300  
B -0.33012400 1.24213600 0.00079400  
B -0.91025800 -0.90684400 0.00021300  
N -1.98796000 -2.08518000 0.00004700  
N -1.68039300 -3.27484900 -0.00041100  
N 2.80006800 -0.67893700 -0.00023000  
N 3.67657300 0.18232900 -0.00079700  
N -0.81229800 2.76424300 0.00020500  
N -1.99678700 3.09143600 -0.00111100  
H -0.13649300 3.53796700 0.00122300  
H -2.49472200 2.16481000 -0.00154500  
H -2.99576300 -1.88576500 0.00007400  
H -0.62897200 -3.24442800 -0.00041100  
H 3.13125200 -1.65145500 -0.00015900  
H 3.12442800 1.07765500 -0.00060200

**NBNH-1**

N -1.10128900 -1.31282900 0.00025800  
N -1.09969200 1.31352400 0.00015200  
N 1.17194200 -0.00095400 -0.00022700  
B -1.64196200 0.00088100 0.00031700  
B 0.18261500 -0.93786400 0.00000000  
B 0.18382500 0.93713900 -0.00008000  
N 5.51356800 0.00058700 -0.00102900  
N -3.24217500 0.00074800 0.00062200  
C -4.38297000 -0.00031200 0.00083500  
H -5.45905300 -0.00134300 0.00094800  
C 4.36061100 -0.00058200 -0.00082400  
H 3.27434900 -0.00161500 -0.00062900

**NBNH-2**

N 0.00029700 -1.29400900 0.00010700  
N -1.31079200 0.94843800 -0.00002600  
N 1.31081700 0.94882200 -0.00034200  
B -1.12106600 -0.47286700 0.00014600  
B 1.12144500 -0.47250400 -0.00012400  
B -0.00004100 1.22567700 -0.00022200  
N 5.35283300 1.02440200 -0.00075000  
N 2.54554200 -1.21455700 -0.00020100  
N -2.54517300 -1.21506600 0.00041400  
N -5.35359200 1.02482400 0.00088900  
C 3.63258300 -1.56450500 -0.00027900  
H 4.66341400 -1.87482400 -0.00007800  
C -3.63224000 -1.56494500 0.00061800  
H -4.66310300 -1.87518300 0.00089800  
C -4.25139300 1.36954200 0.00050800  
H -3.16624200 1.56396500 0.00012200  
C 4.25087000 1.36987200 -0.00083300  
H 3.16580000 1.56476000 -0.00065400

**NBNH-3**

N -1.28803800 -0.73991200 0.00000000  
N 0.00266900 1.48527100 0.00000000  
N 1.28442900 -0.74502100 0.00000000  
B -1.11562200 0.64367000 0.00000000  
B 0.00000000 -1.28755700 0.00000000  
B 1.11490200 0.64435000 0.00000000  
N 5.22334100 -1.07173500 0.00000000  
N -0.08203400 -2.90650000 0.00000000  
N -3.53939100 -3.98939700 0.00000000  
N -2.47629600 1.52476700 0.00000000  
N 2.55791800 1.38189100 0.00000000  
N -1.68182800 5.06081500 0.00000000  
C -0.40509800 -4.00252000 0.00000000  
H -0.73011500 -5.02892300 0.00000000  
C -3.14364100 -2.90226700 0.00000000  
H -2.59501600 -1.90418600 0.00000000  
C -3.26385200 2.35264500 0.00000000  
H -3.99088900 3.14672500 0.00000000  
C 3.66860300 1.65020300 0.00000000  
H 4.71986400 1.88249600 0.00000000  
C -0.93979400 4.17317700 0.00000000  
H -0.35072600 3.19796900 0.00000000  
C 4.08381500 -1.27167300 0.00000000  
H 2.94490200 -1.29504300 0.00000000

**BN-1**

N 1.87442800 1.54048000 -0.00085100  
N 0.72219500 -0.85635800 -0.01738300  
N 3.29273500 -0.67768400 0.01324100  
B 0.73724200 0.73693800 -0.01028500  
B 2.82410900 0.60350000 0.00849200  
B 2.03889800 -1.12808600 0.00095200  
N -0.72200600 0.85575400 -0.00763200  
N -3.29253900 0.67802500 0.00931000  
N -1.87487400 -1.54030200 0.00191300  
B -0.73714300 -0.73716900 -0.00600200  
B -2.82426500 -0.60331600 0.00741600  
B -2.03875600 1.12825100 0.00138800

## Section 2: Tables

**Table S1.** Selected geometrical parameters of the  $B_3N_3$  molecule in the optimized monomer and the complexes

| Parameter     | B3N3  | BNH3-1 | BNH3-2 | BNH3-3 | BNCH-1 | BNCH-2 | BNCH-3 | NCHN-1 | NCHN-2 | NCHN-3 | NBNH-1 | NBNH-2 | NBNH-3 |
|---------------|-------|--------|--------|--------|--------|--------|--------|--------|--------|--------|--------|--------|--------|
| B1-N1 (Å)     | 1.36  | 1.43   | 1.41   | 1.40   | 1.42   | 1.40   | 1.39   | 1.36   | 1.36   | 1.36   | 1.42   | 1.39   | 1.40   |
| N1-B2 (Å)     | 1.36  | 1.34   | 1.42   | 1.40   | 1.34   | 1.40   | 1.39   | 1.36   | 1.36   | 1.36   | 1.34   | 1.39   | 1.39   |
| B2-N2 (Å)     | 1.36  | 1.36   | 1.41   | 1.40   | 1.36   | 1.42   | 1.39   | 1.35   | 1.36   | 1.36   | 1.36   | 1.43   | 1.40   |
| N2-B3 (Å)     | 1.36  | 1.36   | 1.34   | 1.40   | 1.36   | 1.34   | 1.39   | 1.35   | 1.36   | 1.36   | 1.36   | 1.34   | 1.39   |
| B3-N3 (Å)     | 1.36  | 1.34   | 1.34   | 1.40   | 1.34   | 1.34   | 1.39   | 1.36   | 1.35   | 1.36   | 1.34   | 1.34   | 1.40   |
| N3-B1 (Å)     | 1.36  | 1.43   | 1.42   | 1.40   | 1.42   | 1.42   | 1.39   | 1.36   | 1.35   | 1.36   | 1.42   | 1.43   | 1.39   |
| ∠B1-N1-B2 (°) | 88.5  | 96.2   | 107.2  | 104.9  | 95.8   | 105.5  | 102.8  | 88.6   | 88.9   | 89.2   | 96.1   | 107.5  | 105.9  |
| ∠N1-B2-N2 (°) | 151.5 | 153.3  | 133.8  | 135.1  | 153.1  | 135.4  | 137.3  | 151.2  | 151.1  | 150.8  | 152.8  | 133.8  | 134.1  |
| ∠B2-N2-B3 (°) | 88.5  | 86.8   | 94.1   | 104.9  | 86.8   | 93.7   | 102.8  | 88.9   | 88.9   | 89.2   | 86.9   | 94.3   | 105.9  |
| ∠N2-B3-N3 (°) | 151.5 | 153.3  | 156.9  | 135.1  | 153.1  | 156.2  | 137.3  | 151.1  | 150.9  | 150.8  | 152.8  | 156.1  | 134.1  |
| ∠B3-N3-B1 (°) | 88.5  | 96.2   | 94.1   | 104.9  | 95.8   | 93.7   | 102.8  | 88.9   | 89.2   | 89.2   | 96.1   | 94.3   | 105.9  |
| ∠N3-B1-N1 (°) | 151.5 | 134.3  | 133.8  | 135.1  | 135.5  | 135.4  | 137.3  | 151.2  | 150.9  | 150.8  | 135.2  | 133.8  | 134.1  |

| Parameter     | BNNH-1 | BNNH-2 | BNNH-3 |
|---------------|--------|--------|--------|
| B1-N1 (Å)     | 1.43   | 1.41   | 1.41   |
| N1-B2 (Å)     | 1.34   | 1.40   | 1.39   |
| B2-N2 (Å)     | 1.36   | 1.43   | 1.41   |
| N2-B3 (Å)     | 1.36   | 1.34   | 1.39   |
| B3-N3 (Å)     | 1.34   | 1.34   | 1.41   |
| N3-B1 (Å)     | 1.42   | 1.42   | 1.39   |
| ∠B1-N1-B2 (°) | 95.7   | 106.5  | 105.1  |
| ∠N1-B2-N2 (°) | 152.9  | 134.1  | 134.8  |
| ∠B2-N2-B3 (°) | 87.2   | 94.5   | 105.1  |
| ∠N2-B3-N3 (°) | 153.1  | 156.0  | 134.8  |
| ∠B3-N3-B1 (°) | 95.6   | 94.4   | 105.1  |
| ∠N3-B1-N1 (°) | 135.5  | 134.5  | 134.8  |

**Table S2:** The magnitude of the atomic charge on the  $B_3N_3$  and the probe molecules after complex formation.

| Complex | $B_3N_3$ | Probe Molecules                |
|---------|----------|--------------------------------|
| BNH3-1  | -0.12 e  | 0.12 e (NH3)                   |
| BNH3-2  | -0.19 e  | 0.19 e (2x NH3)                |
| BNH3-3  | -0.24 e  | 0.24 e (2x NH3)                |
| BNCH-1  | -0.04 e  | 0.04 e (NCH)                   |
| BNCH-2  | -0.04 e  | 0.04 e (2x NCH)                |
| BNCH-3  | -0.03 e  | 0.03 e (3x NCH)                |
| NCHN-1  | 0.02 e   | -0.02 (HCN)                    |
| NCHN-2  | 0.03 e   | -0.03 (2x HCN)                 |
| NCHN-3  | 0.04 e   | -0.04 (3x HCN)                 |
| NBNH-1  | -0.02 e  | 0.04 (NCH) and -0.02 (HCN)     |
| NBNH-2  | -0.02 e  | 0.06 (NCH) and -0.02 (HCN)     |
| NBNH-3  | 0.15 e   | 0.09 (2xNCH) and -0.24 (2xHCN) |
| BNHN-1  | -0.04 e  | 0.04 e (N2H2)                  |
| BNHN-2  | -0.03 e  | 0.03 e (2XN2H2)                |
| BNHN-3  | 0.02 e   | -0.02 e (3xN2H2)               |

**Table S3:** The magnitude of  $|\mu|$  of the interacting atoms after complex formation.

| Complex | $ \mu $ (of interacting atom in $B_3N_3$ ) | $ \mu $ (of interacting atom of probe molecule) | $ \Delta\mu $ |
|---------|--------------------------------------------|-------------------------------------------------|---------------|
| BNH3-1  | 0.83 a.u. (B)                              | 1.15 a.u. (N)                                   | 0.32          |
| BNH3-2  | 0.80 a.u. (B)                              | 1.06 a.u. (N)                                   | 0.26          |
| BNH3-3  | 0.73 a.u. (B)                              | 0.96 a.u. (N)                                   | 0.23          |
| BNCH-1  | 0.71 a.u. (B)                              | 1.48 a.u. (N)                                   | 0.77          |
| BNCH-2  | 0.67 a.u. (B)                              | 1.38 a.u. (N)                                   | 0.71          |
| BNCH-3  | 0.59 a.u. (B)                              | 1.28 a.u. (N)                                   | 0.69          |
| NCHN-1  | 1.51 a.u. (N)                              | 0.11 a.u. (H)                                   | 1.40          |
| NCHN-2  | 1.47 a.u. (N)                              | 0.10 a.u. (H)                                   | 1.37          |
| NCHN-3  | 1.43 a.u. (N)                              | 0.09 a.u. (H)                                   | 1.34          |
| NBNH-1  | 0.72 a.u. (B)                              | 1.52 a.u. (N)                                   | 0.80          |
|         | 1.61 a.u. (N)                              | 0.13 a.u. (H)                                   | 1.48          |

|               |               |               |      |
|---------------|---------------|---------------|------|
| <b>NBNH-2</b> | 0.62 a.u. (B) | 1.23 a.u. (N) | 0.61 |
|               | 1.53 a.u. (N) | 0.05 a.u. (H) | 1.48 |
| <b>NBNH-3</b> | 1.17 a.u. (B) | 0.57 a.u. (N) | 0.60 |
|               | 1.50 a.u. (N) | 0.13 a.u. (H) | 1.37 |
| <b>BNHN-1</b> | 0.56 a.u. (B) | 0.82 a.u. (N) | 0.26 |
|               | 1.36 a.u. (N) | 0.19 a.u. (H) | 1.17 |
| <b>BNHN-2</b> | 0.53 a.u. (B) | 0.74 a.u. (N) | 0.21 |
|               | 1.41 a.u. (N) | 0.19 a.u. (H) | 1.22 |
| <b>BNHN-3</b> | 0.48 a.u. (B) | 0.67 a.u. (N) | 0.19 |
|               | 1.40 a.u. (N) | 0.17 a.u. (H) | 1.23 |

**Table S4.** Results of localized molecular orbital energy decomposition analysis. Total energy is divided into electrostatics (EL), polarization (POL), dispersion (DISP) and exchange-repulsion (EX-REP). All values in kJ/mol.

| Parameter                   | BNH3-1 | BNH3-2 | BNH3-3  | BNCH-1 | BNCH-2 | BNCH-3 | NCHN-1 | NCHN-2 | NCHN-3 | BNNH-1 | BNNH-2 | BNNH-3  |
|-----------------------------|--------|--------|---------|--------|--------|--------|--------|--------|--------|--------|--------|---------|
| Electrostatic (EL)          | -428.4 | -830.2 | -1190.2 | -280.0 | -533.8 | -732.5 | -22.3  | -40.3  | -54.1  | -422.0 | -838.6 | -1246.8 |
| Polarization (POL)          | -396.7 | -735.2 | -1001.8 | -343.0 | -623.4 | -806.0 | -11.3  | -19.2  | -24.1  | -413.0 | -797.4 | -1145.5 |
| Dispersion (DISP)           | -89.0  | -174.6 | -256.8  | -76.1  | -149.2 | -216.6 | -10.6  | -19.5  | -26.9  | -99.6  | -199.6 | -300.8  |
| Exchange-Repulsion (EX-REP) | 673.2  | 1308.4 | 1889.3  | 562.9  | 1076.8 | 1488.8 | 26.4   | 49.3   | 63.8   | 690.6  | 1370.7 | 2043.3  |
| Total                       | -240.9 | -431.6 | -559.5  | -136.2 | -229.7 | -266.3 | -17.8  | -29.7  | -41.3  | -244.1 | -464.9 | -649.8  |

**Table S5.** Topological parameters for the  $C(\pi)\cdots C(\pi)$  interaction observed in NBNH-2 and NBNH-3

| Complex | $C(\pi)\cdots C(\pi)$ (Å) | $\rho^a$ ( $e/\text{Å}^3$ ) | $\nabla^2\rho^a$ ( $e/\text{Å}^5$ ) | $ V /G^a$ |
|---------|---------------------------|-----------------------------|-------------------------------------|-----------|
| NBNH-2  | 3.00                      | 0.07                        | 0.81                                | 0.72      |
| NBNH-3  | 2.95                      | 0.06                        | 0.89                                | 0.73      |

### Section 3: Figures

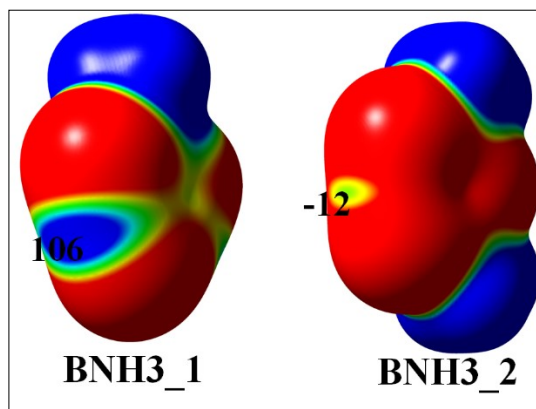

**Figure S1.** The electrostatic potential map of BNH3-1 and BNH3-2. The ESP maps were drawn on 0.001 au electron density isosurface. All values are in kJ/mol.

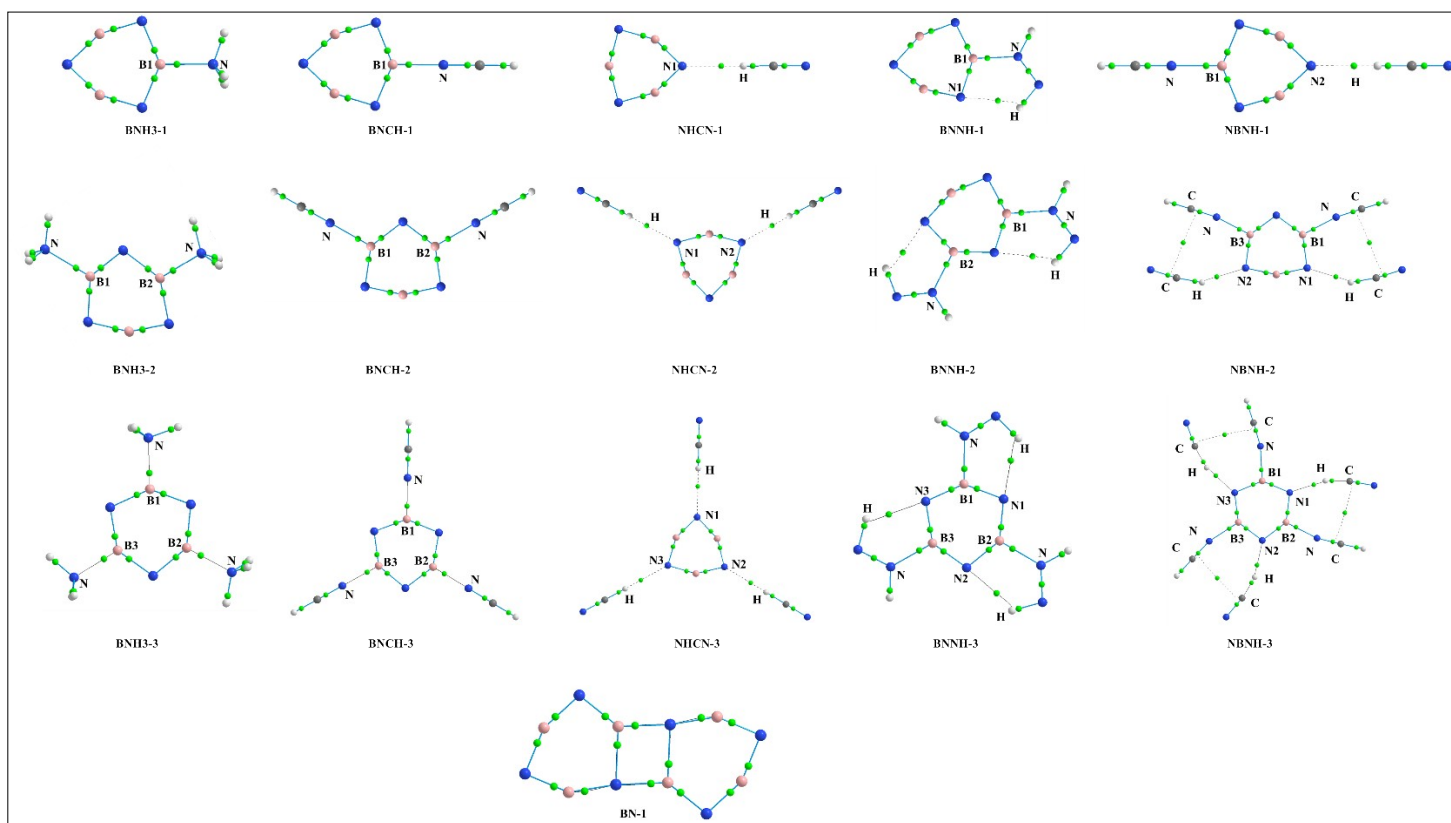

**Figure S2.** Molecular graphs representing the existence of B...N triel bond and H...N bond critical point.
